# Supplementary material for: Enhancing catalytic performance of Cu-SSZ-13 for the NH3-SCR reaction via in situ introduction of Fe3+ with diatomite
Source: Royal Society of Chemistry journal article supplement (doi:10.1039/d1qm01101d), 2021-01-01
Supplement: d1qm01101d1.pdf [file d1qm01101d1.pdf]

## Supplementary Information

### **Enhancing catalytic performance of Cu-SSZ-13 for NH<sub>3</sub>-SCR reaction via *in situ* introduction of Fe<sup>3+</sup> with diatomite**

Mengyang Chen,<sup>ab</sup> Yingzhen Wei,<sup>a</sup> Jinfeng Han,<sup>a</sup> Wenfu Yan,<sup>\*a</sup> and Jihong Yu<sup>\*ab</sup>

<sup>a</sup> State Key Laboratory of Inorganic Synthesis and Preparative Chemistry, College of Chemistry, Jilin University,  
2699 Qianjin Street, Changchun 130012, P. R. China.

<sup>b</sup> International Center of Future Science, Jilin University, 2699 Qianjin Street, Changchun 130012, P. R. China.

Corresponding Authors.

\*E-mail: yanw@jlu.edu.cn; jihong@jlu.edu.cn

## **Experimental section**

### **Materials**

Diatomite (Table S1, Tianjin Guangfu Chemical Reagents Co., Ltd, Tianjin, China), aluminum hydroxide ( $\text{Al}(\text{OH})_3$ , 99 wt.%, Tianjin Fuchen Chemical Reagents Company, Tianjin, China), aluminum hydroxide ( $\text{Al}(\text{OH})_3$ , 76.5 wt.%, Alfa Aesar, Heysham, UK), Ludox® HS-40 colloidal silica (40 wt.%, Sigma-Aldrich, Los Angeles; USA ), copper (II) nitrate trihydrate ( $\text{Cu}(\text{NO}_3)_2 \cdot \text{H}_2\text{O}$ , purity above 99.5 wt.%, Tianjin Fuchen Chemical Reagents Company, Tianjin, China), sodium hydroxide ( $\text{NaOH}$ , 98 wt.%, Beijing Chemical Works, Beijing, China) and N,N,N-trimethyl-1-adamantane ammonium hydroxide (TMAdaOH, 25 wt.%, Beijing Innochem Chemical Reagent Co., Ltd, Beijing, China).

### **Synthesis of SSZ-13-D using diatomite as silicon source**

SSZ-13-D zeolites with different silicon content or different crystallization time were synthesized via a hydrothermal method as described as below. Typically, 0.2 g  $\text{NaOH}$  and 3 g TMAdaOH were dissolved in 6.65 g deionized water. Thereafter, 0.156 g  $\text{Al}(\text{OH})_3$  (99 wt.%) was added. After stirring for 1 h, 3 g diatomite was mixed with the final solution, followed by stirring for 3 h. The final composition of the typical synthesis mixture was 0.5  $\text{Al}_2\text{O}_3$ : 11  $\text{SiO}_2$ : 2.5  $\text{NaOH}$ : 1.8 TMAdaOH: 250  $\text{H}_2\text{O}$ . The mixture was transferred into a 20 mL autoclave and the hydrothermal synthesis was then carried out at 160 °C under static condition for different crystallization time (0-72 h). The obtained sample was centrifuged and washed several times with deionized (DI) water, then dried overnight at 80 °C, followed by calcination at 600 °C for 8 h. The as-synthesized SSZ-13 zeolite is denoted as SSZ-13-D, in which D stands for diatomite.

### **Synthesis of SSZ-13-S and Fe-SSZ-13 using silica sol as silicon source**

SSZ-13-S zeolites with different crystallization time were synthesized via a hydrothermal method as described as below. Typically, 0.2 g  $\text{NaOH}$  and 3 g TMAdaOH were dissolved in 7.15 g deionized water. Thereafter, 0.1 g  $\text{Al}(\text{OH})_3$  (76.5 wt.%) was added under stirring. Afterwards, 1.825 g silica sol was added to the mixture under

stirring. The molar ratio of the final mixture was 0.5 Al<sub>2</sub>O<sub>3</sub>: 12 SiO<sub>2</sub>: 5 NaOH: 3.57 TMAOH: 522 H<sub>2</sub>O. The mixture was transferred into a 20 mL autoclave and the hydrothermal synthesis was then carried out at 160 °C under static condition for different crystallization time (0-120 h). The obtained sample was centrifuged and washed several times with deionized (DI) water, then dried overnight at 80 °C, followed by calcination at 600 °C for 8 h. The as-synthesized SSZ-13 zeolite is denoted as SSZ-13-S, in which D stands for silica sol.

The control Fe-SSZ-13 crystallized from silica sol was synthesized according to the literature <sup>1</sup>. The synthesis procedure is the same to that of SSZ-13-S besides that 0.03 g Fe(NO<sub>3</sub>)<sub>3</sub>·9H<sub>2</sub>O was added into the mixture before the addition of TMAOH and silica sol. The molar ratio of the final reaction mixture was 0.5 Al<sub>2</sub>O<sub>3</sub>: 12 SiO<sub>2</sub>: 5 NaOH: 3.57 TMAOH: 0.07 Fe: 522 H<sub>2</sub>O. Finally, the mixture was transferred into a 20 mL Teflon-lined stainless-steel autoclave heating in an oven at 160 °C under static conditions for different crystallization time (0-96 h). The as-synthesized SSZ-13 zeolite denoted as Fe-X h (X represents the different crystallization time) was centrifuged, and washed several times with water and ethanol, then dried overnight at 80 °C, followed by calcination at 600 °C for 8 h.

### **Preparation and high temperature hydrothermal ageing of Cu-SSZ-13 catalysts**

Cu-SSZ-13 catalysts were prepared via an ion exchange method. The detail steps were listed in supplementary information. The SSZ-13 zeolites were ion-exchanged twice with 1 M NH<sub>4</sub>NO<sub>3</sub> at 80 °C to mostly remove Na<sup>+</sup> ions for getting NH<sub>4</sub>-SSZ-13. Then, copper ions were introduced by the ion-exchange of NH<sub>4</sub>-SSZ-13 with aqueous solution of 0.05 M Cu(NO<sub>3</sub>)<sub>2</sub> at 80 °C for 1 h. Thereafter, the zeolite slurries were filtered, washed with DI water and dried at 80 °C overnight. Subsequently, the samples were calcined in a muffle oven at 550 °C for 5 h. The SSZ-13-S and SSZ-13-D exchanged with copper ions were denoted as Cu-SSZ-13-S and Cu-SSZ-13-D, respectively. To investigate the hydrothermal stability of the Cu-catalysts, Cu-SSZ-13-S and Cu-SSZ-13-D were hydrothermally aged in flowing air containing 10 vol.% H<sub>2</sub>O at 750 °C for 16 h and denoted as Cu-SSZ-13-S\_HTA and Cu-SSZ-13-D\_HTA, respectively.

### **NH<sub>3</sub>-SCR catalytic test**

SCR activity measurements of the catalysts were performed in a fixed-bed quartz reactor with an inner diameter of 6 mm. The catalysts of 0.1 g with particle size of 40-60 mesh were placed in the tubular reactor. The reaction conditions were as follows: 500 ppm NO, 500 ppm NH<sub>3</sub>, 5% O<sub>2</sub>, 5% H<sub>2</sub>O, N<sub>2</sub> as balance gas. The total flow rate was 500 mL/min and thus a normal gaseous hourly space velocity (GHSV) of ~200,000 h<sup>-1</sup> (0.1 g catalysts were used for evaluation). The inlet and outlet gas compositions were monitored by a FTIR spectrometer (MKS, MultiGas 2030HS). NO conversion was calculated as  $\text{NO}\% = (1 - ([\text{NO}]_{\text{out}} + [\text{NO}_2]_{\text{out}}) / ([\text{NO}]_{\text{in}} + [\text{NO}_2]_{\text{in}})) \times 100\%$ , N<sub>2</sub> selectivity was calculated as  $\text{N}_2\% = (1 - ([\text{NO}_2]_{\text{out}} + 2[\text{N}_2\text{O}]_{\text{out}}) / ([\text{NO}]_{\text{in}} + [\text{NO}_2]_{\text{in}} + [\text{NH}_3]_{\text{in}})) \times 100\%$ .

### **Characterization**

The crystallinity and phase purity of the samples were characterized by power X-ray diffraction (XRD) on a Rigaku D-Max 2550 diffractometer (Rigaku Corporation, Tokyo, Japan) using Cu K<sub>α</sub> radiation ( $\lambda = 1.5418 \text{ \AA}$ ). The relative crystallinity was evaluated by comparing the sum of the peak areas ((at  $2\theta = 9.7^\circ, 16.3^\circ, 20.9^\circ, 31.1^\circ$  and  $31.6^\circ$ ) of the synthesized samples. Back-scattering scanning electron microscopy images and scanning electron microscopy (SEM) images were measured with JEOL JSM-7800F (JEOL Ltd., Tokyo, Japan). Transmission electron microscopy (TEM) images were recorded on a Tecnai G2 S-Twin F20 (FEI Company, Oregon, USA). Chemical composition was determined with inductively coupled plasma (ICP) analyses carried out on a Perkin-Elmer Optima 3300 DV ICP instrument (PerkinElmer, Inc., Waltham, Massachusetts, USA) and an X-ray fluorescence (XRF) spectrometer (PANalytical-AXIOS, Amsterdam, Netherlands). Nitrogen adsorption/desorption measurements were carried out on a Micromeritics 2020 analyzer (Micromeritics Instrument Corp., Norcross, Georgia, USA) at 77.35 K after the samples were degassed at 350 °C under vacuum. The temperature-programmed desorption of ammonia (NH<sub>3</sub>-TPD) experiments were performed using a Micromeritics AutoChemII 2920 automated chemisorption analysis unit (Micromeritics Instrument Corp., Norcross, Georgia, USA)

with a thermal conductivity detector (TCD) under helium flow. Solid-state  $^{29}\text{Si}$  NMR and  $^{27}\text{Al}$  NMR experiments were performed on Bruker Avance Neo 600Mz WB spectrometer with BBO MAS probe operating at a magnetic field strength of 14.1 T (Bruker Company, Karlsruhe, Germany). Fourier Transform infrared spectroscopy (FTIR) spectrums were measured on a Bruker FTIR IFS-80V/S with KBr pellets (Bruker Company, Karlsruhe, Germany), and a baseline correction was applied after measurement. The electron paramagnetic resonance (EPR) spectrum was obtained with a JES-FA200 (JEOL Ltd., Tokyo, Japan) to investigate Fe species. The EPR signals of  $\text{Cu}^{2+}$  species were recorded at 150 K on an EMXPLUS10/12 ESR spectrometer. (Bruker Company, Karlsruhe, Germany) in the region of 2200–3800 G. The  $\text{H}_2$ -TPR experiments were performed on an AutoChemII 2920 analyzer (Micromeritics Instrument Corp., Norcross, Georgia, USA). The sample was pretreated in air atmosphere at 500 °C for 1 h before TPR was conducted in 10%  $\text{H}_2/\text{Ar}$  at a flow rate of 50 ml/min. X-ray photoelectron spectroscopy (XPS) spectra were measured using a Thermo ESCALAB 250 spectrometer (Thermo Scientific, New York, USA) with monochromatized Al  $K_\alpha$  excitation. Ultraviolet -Visible diffuse reflection spectrums (UV-Vis DRS) were obtained in the range of 200-800 nm on a  $\lambda$  Lambda 950 spectrometer (PerkinElmer, Massachusetts, USA) at the ambient temperature.

## Figures

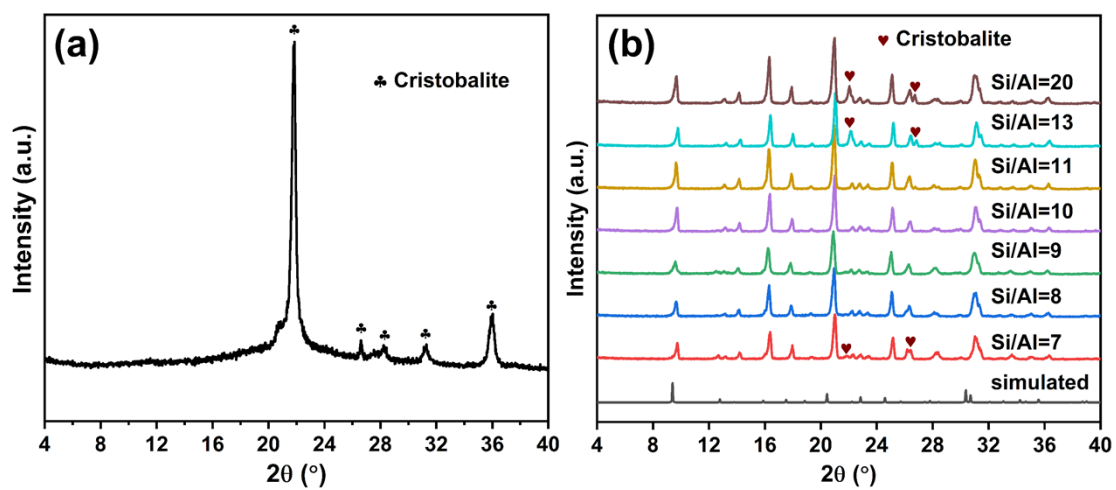

**Fig. S1** XRD analysis of (a) raw diatomite and (b) as-synthesized samples using diatomite as silicon source.

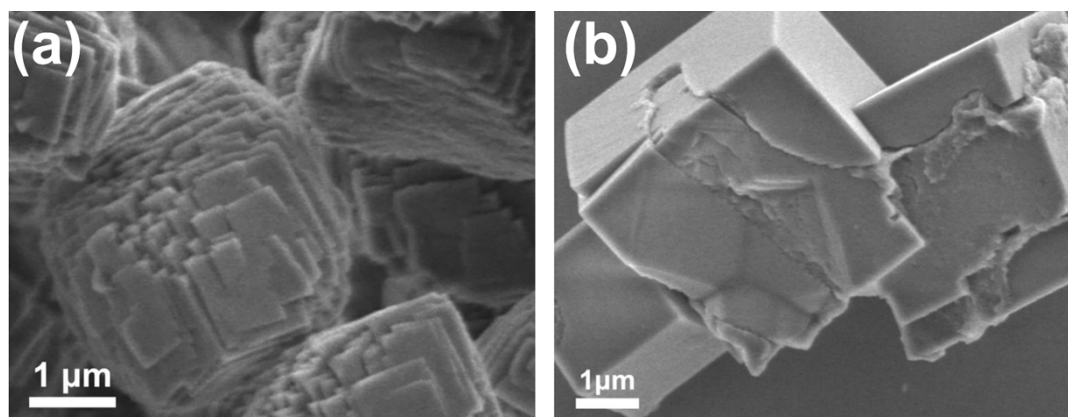

**Fig. S2** The SEM images of SSZ-13-S crystallized at 120 h (a) and SSZ-13-D crystallized at 60 h (b).

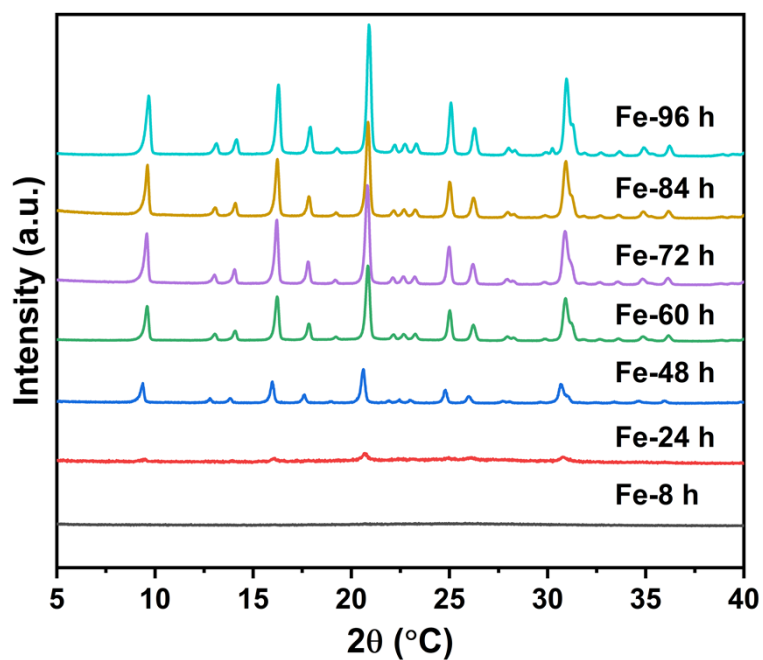

**Fig. S3** Time-dependent XRD patterns of Fe-SSZ-13 obtained at varied period of crystallization times.

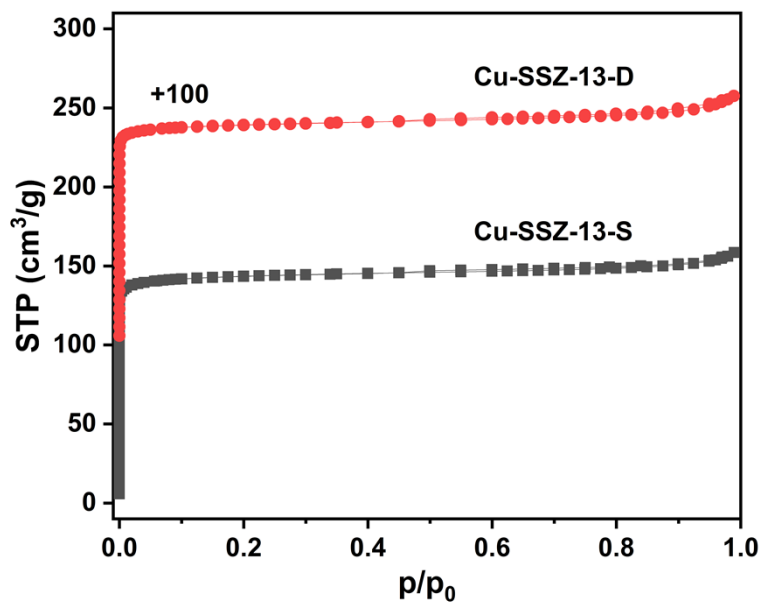

**Fig. S4** Nitrogen adsorption-desorption isotherms of Cu-SSZ-13-S and Cu-SSZ-13-D catalysts.

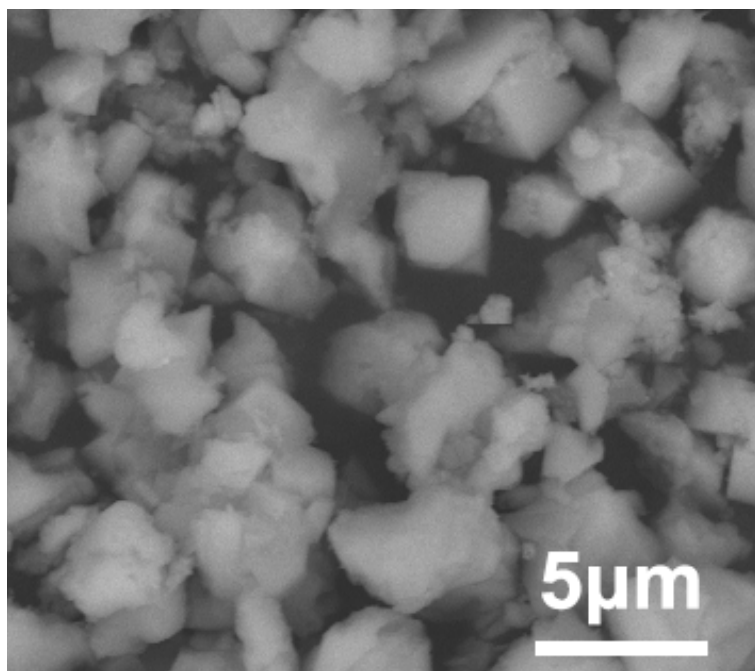

**Fig. S5** Back-scattering SEM image of Cu-SSZ-13-D catalyst.

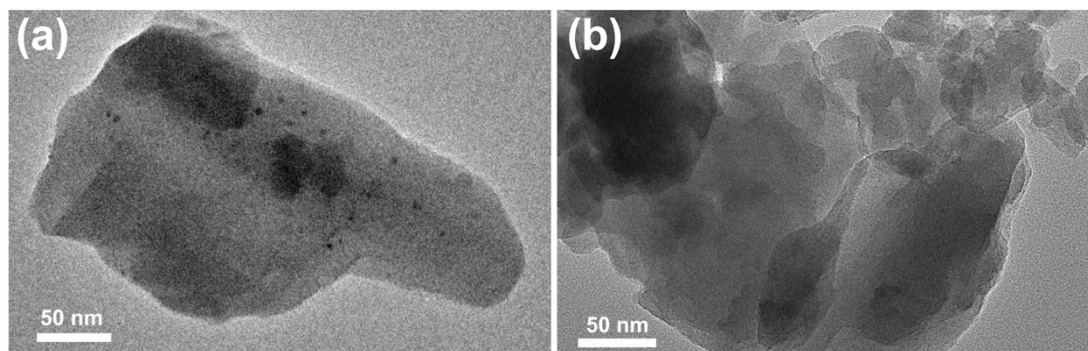

**Fig. S6** TEM images of (a) Cu-SSZ-13-S catalyst and (b) Cu-SSZ-13-D catalyst.



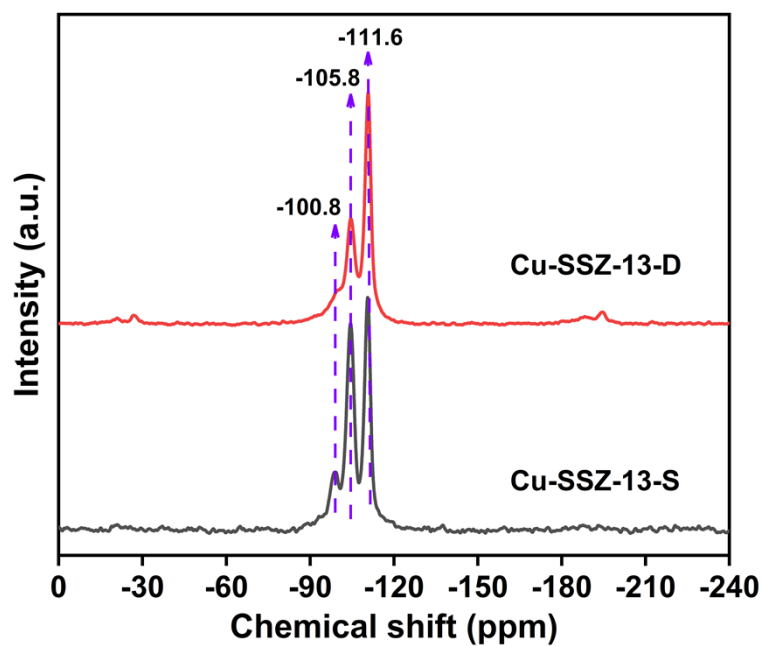

**Fig. S7**  $^{29}\text{Si}$  MAS NMR spectra of Cu-SSZ-13-S and Cu-SSZ-13-D catalysts.

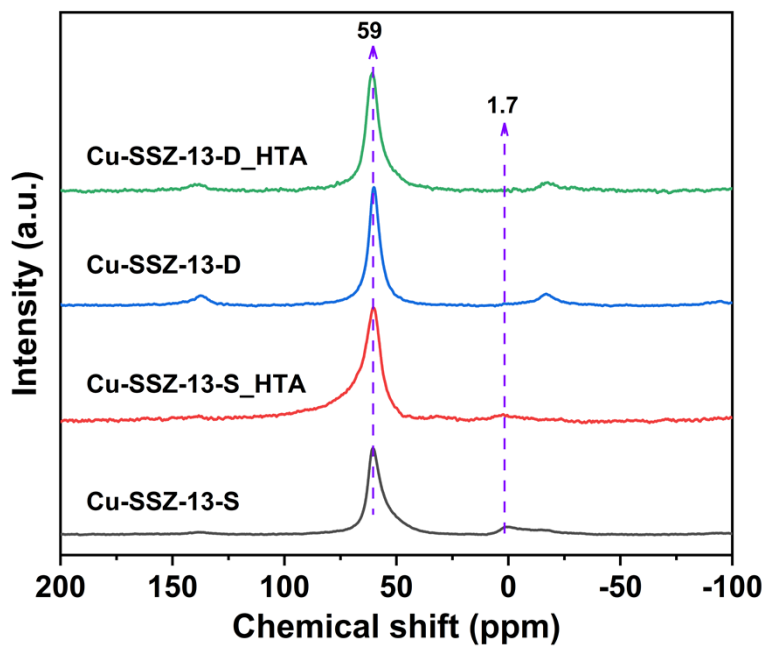

**Fig. S8**  $^{27}\text{Al}$  MAS NMR spectra of Cu-SSZ-13-S, Cu-SSZ-13-S\_HTA, Cu-SSZ-13-D and Cu-SSZ-13-D\_HTA catalysts.

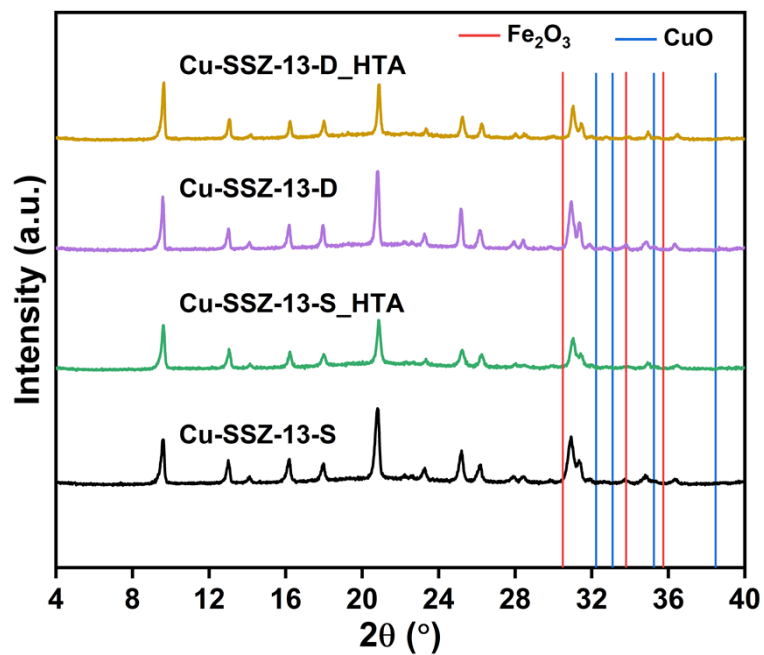

**Fig. S9** The XRD patterns of fresh and aged Cu catalysts and the simulated XRD patterns of  $\text{CuO}$  and  $\text{Fe}_2\text{O}_3$ .

## Tables

**Table S1.** Chemical composition of diatomite determined by XRF.

| Composition | Si     | Al    | Fe    | Na    | Ca    | K    | Ti    | O      |
|-------------|--------|-------|-------|-------|-------|------|-------|--------|
| Wt. %       | 41.604 | 1.987 | 1.254 | 3.348 | 0.192 | 0.45 | 0.096 | 51.069 |

**Table S2.** The comparison of catalytic performance between Cu-SSZ-13-D and other CuFe-zeolites.

| Sample                                         | Si/Al, Cu wt %,<br>Fe wt % | Test conditions                                                                                                                                                            | NO<br>conversion<br>≥90 % | note         |
|------------------------------------------------|----------------------------|----------------------------------------------------------------------------------------------------------------------------------------------------------------------------|---------------------------|--------------|
| Fe-Cu-SSZ-13-1                                 | 3.73; 0.13; 0.089          | 1000 ppm NO, 1000 ppm NH <sub>3</sub> ,<br>3% O <sub>2</sub> , GHSV=50,000 h <sup>-1</sup>                                                                                 | 225–550 °C                | Ref [2]      |
| Fe <sub>0.53</sub> /Cu <sub>1.55</sub> -SSZ-13 | 5; 1.55; 0.53              | 500 ppm NO, 500 ppm NH <sub>3</sub> ,<br>5% O <sub>2</sub> , GHSV=50,000 h <sup>-1</sup>                                                                                   | 175–500 °C                | Ref [3]      |
| FeCu-SSZ-13M                                   | /; 4.8; 0.5                | 500 ppm NO, 500 ppm NH <sub>3</sub> ,<br>5% O <sub>2</sub> , GHSV=180,000 h <sup>-1</sup>                                                                                  | 200–550 °C                | Ref [4]      |
| CuFe-SSZ-13                                    | /; 2.71; 0.357             | 8.5% O <sub>2</sub> , 8.0% CO <sub>2</sub> , 7.25%<br>H <sub>2</sub> O, 250 ppm NO <sub>2</sub> , 250 ppm<br>NO, 500 ppm NH <sub>3</sub> , GHSV=<br>50,000 h <sup>-1</sup> | 200–450 °C                | Ref [5]      |
| Cu-SSZ-13-D                                    | 9.7; 2.3; 0.89             | 500 ppm NO, 500 ppm NH <sub>3</sub> ,<br>5% O <sub>2</sub> , 5% H <sub>2</sub> O,<br>GHSV=200,000 h <sup>-1</sup>                                                          | 200–550 °C                | This<br>work |

## References

- [1] S. Andonova, S. Tamm, C. Montreuil, C. Lambert, L. Olsson, *Appl. Catal. B*, 2016, **180**, 775-787.
- [2] T. Zhang, J. Li, J. Liu, D. Wang, Z. Zhao, K. Cheng, J. Li, *AIChE J.*, 2015, **61**, 3825-3837.
- [3] J. Wan, J. Chen, R. Zhao, R. Zhou, *J. Environ. Sci.*, 2021, **100**, 306-316.
- [4] Y. Yue, B. Liu, P. Qin, N. Lv, T. Wang, X. Bi, H. Zhu, P. Yuan, Z. Bai, Q. Cui, X. Bao, *Chem. Eng. J.*, 2020, **398**, 125515-125526.
- [5] X. Yang, Z. Wu, M. Moses-Debusk, D. R. Mullins, S. M. Mahurin, R. A. Geiger, M. Kidder, C. K. Narula, *J. Phys. Chem. C*, 2012, **116**, 23322-23331.
